# Supplementary material for: Urinary Metabolomics in Young Soccer Players after Winter Training Season
Source: MDPI journal article supplement (doi:10.3390/metabo12121283), 2022-12-17
Supplement: s1 [file s1]

Table S1. Physical properties including height, body weight, muscle, body fat, and body mass index (BMI) of the individual subjects

|           | Height (cm) | Body weight (kg) | Muscle mass (kg) | Body mass index (BMI) | Body fat (kg) |
|-----------|-------------|------------------|------------------|-----------------------|---------------|
| Subject1  | 145.4       | 40.3             | 18.8             | 19.1                  | 14.3          |
| Subject2  | 144.1       | 42.5             | 17.9             | 20.5                  | 20.8          |
| Subject3  | 143.2       | 36.1             | 16.6             | 17.6                  | 13.0          |
| Subject4  | 143.7       | 32.3             | 14.7             | 15.6                  | 12.4          |
| Subject5  | 141.8       | 41.9             | 16.2             | 20.8                  | 26.6          |
| Subject6  | 153.8       | 39.9             | 19.3             | 16.9                  | 10.0          |
| Subject7  | 148.4       | 33.1             | 15.9             | 15.0                  | 8.9           |
| Subject8  | 142.0       | 29.8             | 13.8             | 14.8                  | 10.4          |
| Subject9  | 145.3       | 32.0             | 14.3             | 15.2                  | 13.4          |
| Subject10 | 140.1       | 32.9             | 14.6             | 16.8                  | 15.2          |
| Subject11 | 136.2       | 34.1             | 14.2             | 18.4                  | 19.1          |
| Subject12 | 141.8       | 35.4             | 14.8             | 17.6                  | 19.2          |
| Subject13 | 141.1       | 40.8             | 16.5             | 20.5                  | 24.0          |
| Subject14 | 137.5       | 31.0             | 14.2             | 16.5                  | 13.0          |
| Mean      | 143.2       | 35.9             | 15.8             | 17.5                  | 15.7          |
| SD        | 4.4         | 4.4              | 1.8              | 2.1                   | 5.4           |

Figure S1. Schematic diagram of the experimental schedule in the study.

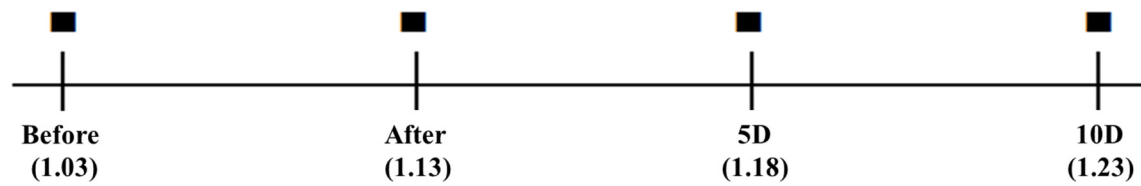

**<Morning training>**

| Exercise         |                                                                                                       | Duration | Day                  |
|------------------|-------------------------------------------------------------------------------------------------------|----------|----------------------|
| Technical drills | Coordination, Ball control, 5 : 2 passing, passing game, dribbling, shooting, crossing, ball heading, | 25 min   | Mon,<br>Wed,<br>Fri, |
| Tactical drills  | Set piece, strategies (Attacking, defending, corner kicks)                                            | 25 min   |                      |
| Mini games       |                                                                                                       | 40 min   |                      |
| Friendly match   |                                                                                                       | 90 min   | Tue,<br>Thu          |

**<Afternoon training>**

Complex physical training program

| Order               | Exercise type         | Time   | Intensity                 | Day                 |
|---------------------|-----------------------|--------|---------------------------|---------------------|
| Warm-up             | Stretching            | 5 min  |                           |                     |
| FIFA 11+ Kids       | Running game          | 20 min | 5 stop / 3 set            | Mon,<br>Wed,<br>Fri |
|                     | Skating jumps         |        | 6 each / 3set             |                     |
|                     | Single leg jumps      |        | 5 per leg / 3 set         |                     |
|                     | Ball passing          |        | 5 per leg / 3 set         |                     |
|                     | Spider man            |        | 3 set                     |                     |
|                     | Push-up               |        | 20 sec / 3 set            |                     |
|                     | Falling techniques    |        | 5-7 per side / 1 set      |                     |
| Resistance training | Lunge                 | 30 min | 12-20 reps / 3 sets,      |                     |
|                     | Single-leg calf raise |        | Rest between set: 30 sec, |                     |
|                     | Back extension        |        | Rest between exercise: 1  |                     |
|                     | Bicycle crunch        |        | min                       |                     |
| Coll-down           | Stretching            | 5 min  |                           |                     |

Table S2. Fold-change and VIP of identified metabolites between before and 1, 5 or 10 day after WTS in PLS-DA.

| No. | Metabolites                | Fold change / VIP |             |                 |             |                  |             |
|-----|----------------------------|-------------------|-------------|-----------------|-------------|------------------|-------------|
|     |                            | After_1D/Before   |             | After_5D/Before |             | After_10D/Before |             |
|     |                            | Fold change       | VIP[1]      | Fold change     | VIP[1]      | Fold change      | VIP[1]      |
| 1   | 1,3-Dihydroxyacetone       | 1.10              | 0.46        | 0.90            | 0.54        | 0.96             | 0.20        |
| 2   | 1,3-Dimethylurate          | 1.00              | 0.00        | 0.71            | <b>1.42</b> | 0.66             | <b>1.63</b> |
| 3   | 1-Methylnicotinamide       | 1.91              | <b>2.39</b> | 0.94            | 0.33        | 1.08             | 0.31        |
| 4   | 2-Amino adipate            | 0.98              | 0.18        | 0.88            | <b>0.98</b> | 0.78             | <b>1.60</b> |
| 5   | 2-Hydroxy-3-methylvalerate | 0.92              | <b>0.92</b> | 1.04            | 0.55        | 1.00             | 0.03        |
| 6   | 2-Hydroxybutyrate          | 0.92              | 0.75        | 1.42            | <b>2.15</b> | 0.83             | <b>1.58</b> |
| 7   | 2-Hydroxyisobutyrate       | 0.95              | 0.45        | 0.90            | <b>0.96</b> | 0.92             | 0.70        |
| 8   | 2-Hydroxyphenylacetate     | 1.37              | 0.88        | 0.93            | 0.31        | 0.78             | <b>1.67</b> |
| 9   | 2-Octenoate                | 1.33              | <b>1.01</b> | 0.99            | 0.03        | 1.01             | 0.04        |
| 10  | 2-Oxoglutarate             | 0.89              | 0.70        | 1.12            | 0.64        | 0.85             | <b>0.92</b> |
| 11  | 2-Oxoisocaproate           | 0.84              | <b>1.78</b> | 0.93            | 0.80        | 0.89             | 1.36        |
| 12  | 2-Phenylpropionate         | 0.87              | <b>0.95</b> | 0.82            | <b>1.38</b> | 0.95             | 0.31        |
| 13  | 3-Hydroxybutyrate          | 1.03              | 0.31        | 0.90            | <b>0.98</b> | 0.88             | 1.03        |
| 14  | 3-Hydroxyisovalerate       | 1.10              | 0.70        | 1.12            | 0.76        | 1.18             | <b>1.18</b> |
| 15  | 3-Indoxylsulfate           | 1.84              | <b>1.74</b> | 0.97            | 0.13        | 0.98             | 0.09        |
| 16  | 3-Methyl-2-oxovalerate     | 1.03              | 0.41        | 0.99            | 0.10        | 0.94             | 0.88        |
| 17  | 3-Phenyllactate            | 1.22              | <b>1.07</b> | 0.86            | 0.66        | 0.78             | <b>1.24</b> |
| 18  | 4-Aminobutyrate            | 1.10              | 0.71        | 1.07            | 0.72        | 1.00             | 0.01        |

|    |                    |      |             |      |             |      |             |
|----|--------------------|------|-------------|------|-------------|------|-------------|
| 19 | Acetate            | 1.14 | 0.60        | 1.16 | <b>0.92</b> | 0.91 | 0.49        |
| 20 | Acetoacetate       | 1.20 | <b>1.00</b> | 0.86 | <b>0.96</b> | 0.89 | 0.72        |
| 21 | Acetone            | 1.14 | <b>1.13</b> | 1.25 | <b>1.57</b> | 1.02 | 0.19        |
| 22 | Adenine            | 0.88 | 0.40        | 2.02 | <b>1.81</b> | 0.84 | 0.43        |
| 23 | Alanine            | 0.85 | <b>0.93</b> | 1.30 | <b>1.35</b> | 0.92 | 0.43        |
| 24 | Anserine           | 0.78 | <b>1.00</b> | 0.80 | <b>0.90</b> | 0.52 | <b>2.04</b> |
| 25 | Arginine           | 1.06 | 0.32        | 1.04 | 0.19        | 1.04 | 0.18        |
| 26 | Asparagine         | 0.89 | 0.69        | 1.06 | 0.35        | 0.93 | 0.46        |
| 27 | Aspartate          | 0.97 | 0.24        | 0.95 | 0.46        | 0.86 | <b>1.21</b> |
| 28 | Betaine            | 0.79 | <b>1.21</b> | 0.76 | <b>1.31</b> | 0.58 | <b>2.07</b> |
| 29 | Caffeine           | 0.93 | 0.36        | 0.82 | <b>0.91</b> | 0.69 | <b>1.35</b> |
| 30 | Carnitine          | 1.18 | 0.60        | 1.49 | <b>1.54</b> | 0.94 | 0.17        |
| 31 | Choline            | 0.89 | 0.74        | 1.05 | 0.32        | 0.87 | <b>1.06</b> |
| 32 | Citrate            | 0.66 | <b>1.67</b> | 1.04 | 0.20        | 0.83 | 0.79        |
| 33 | Creatine           | 1.30 | 0.68        | 1.47 | <b>1.00</b> | 2.34 | <b>1.57</b> |
| 34 | Creatine phosphate | 1.20 | <b>0.93</b> | 1.05 | 0.23        | 0.93 | 0.34        |
| 35 | Dimethyl sulfone   | 0.73 | <b>1.70</b> | 0.66 | <b>2.54</b> | 1.02 | 0.09        |
| 36 | Dimethylamine      | 1.00 | 0.01        | 0.99 | 0.09        | 1.03 | 0.23        |
| 37 | Formate            | 1.01 | 0.05        | 0.84 | 0.75        | 0.98 | 0.09        |
| 38 | Galactarate        | 1.35 | <b>2.04</b> | 0.93 | 0.64        | 0.92 | 0.63        |
| 39 | Galactose          | 0.74 | 0.68        | 0.79 | 0.59        | 0.78 | 0.58        |
| 40 | Glucose            | 0.92 | 0.71        | 0.91 | <b>1.06</b> | 0.85 | <b>1.43</b> |
| 41 | Glutamate          | 1.13 | <b>1.09</b> | 0.99 | 0.08        | 0.79 | <b>1.88</b> |

|    |                     |      |             |      |             |      |             |
|----|---------------------|------|-------------|------|-------------|------|-------------|
| 42 | Glutamine           | 1.13 | <b>1.20</b> | 1.09 | 0.82        | 1.08 | 0.78        |
| 43 | Glutarate           | 1.12 | <b>0.92</b> | 1.15 | 0.73        | 1.05 | 0.33        |
| 44 | Glutathione         | 0.81 | <b>1.18</b> | 0.79 | <b>1.50</b> | 0.64 | <b>2.23</b> |
| 45 | Glycerol            | 1.16 | <b>0.95</b> | 0.92 | 0.56        | 0.76 | <b>1.38</b> |
| 46 | Glycine             | 0.62 | <b>1.87</b> | 0.85 | 0.70        | 0.94 | 0.30        |
| 47 | Glycolate           | 0.82 | 0.58        | 1.00 | 0.00        | 0.74 | 0.84        |
| 48 | Hippurate           | 1.19 | 0.55        | 1.71 | 0.87        | 1.24 | 0.49        |
| 49 | Histamine           | 1.08 | 0.38        | 0.83 | <b>0.98</b> | 0.66 | <b>1.73</b> |
| 50 | Histidine           | 0.98 | 0.08        | 1.18 | 0.68        | 0.90 | 0.54        |
| 51 | Isobutyrate         | 1.04 | 0.25        | 1.40 | <b>1.35</b> | 1.05 | 0.32        |
| 52 | Lactate             | 0.72 | <b>0.91</b> | 2.78 | <b>1.48</b> | 0.81 | 0.58        |
| 53 | Lactose             | 0.81 | 0.71        | 0.75 | <b>0.95</b> | 0.84 | 0.55        |
| 54 | Leucine             | 1.19 | <b>1.69</b> | 1.19 | <b>1.84</b> | 1.00 | 0.02        |
| 55 | Malonate            | 1.06 | 0.47        | 0.96 | 0.33        | 0.96 | 0.37        |
| 56 | Maltose             | 1.18 | 0.64        | 0.73 | <b>1.36</b> | 0.56 | <b>1.76</b> |
| 57 | Mannitol            | 0.69 | <b>1.09</b> | 0.83 | 0.56        | 0.93 | 0.16        |
| 58 | Methionine          | 1.07 | 0.43        | 1.38 | <b>1.43</b> | 1.00 | 0.01        |
| 59 | Methylamine         | 1.13 | <b>0.92</b> | 1.02 | 0.13        | 0.96 | 0.33        |
| 60 | Methylguanidine     | 0.80 | <b>1.02</b> | 1.21 | <b>0.90</b> | 1.05 | 0.19        |
| 61 | Methylmalonate      | 1.12 | <b>1.16</b> | 0.88 | <b>1.32</b> | 0.83 | <b>1.73</b> |
| 62 | N,N-Dimethylglycine | 1.02 | 0.10        | 0.92 | 0.40        | 0.93 | 0.33        |
| 63 | N-Acetylglucosamine | 0.87 | 0.63        | 0.76 | <b>1.25</b> | 0.77 | <b>1.08</b> |
| 64 | N-Acetyltyrosine    | 1.22 | <b>1.84</b> | 1.02 | 0.17        | 0.99 | 0.08        |

|    |                        |      |             |      |             |      |             |
|----|------------------------|------|-------------|------|-------------|------|-------------|
| 65 | N-Phenylacetylglycine  | 1.59 | <b>2.53</b> | 1.06 | 0.39        | 0.94 | 0.14        |
| 66 | O-Acetylcholine        | 1.16 | 0.61        | 1.29 | <b>1.12</b> | 1.02 | 0.08        |
| 67 | Pyruvate               | 0.97 | 0.20        | 1.16 | 0.59        | 0.92 | 0.45        |
| 68 | Succinate              | 1.35 | <b>1.43</b> | 1.27 | <b>0.99</b> | 0.85 | 0.63        |
| 69 | Succinylacetone        | 1.08 | 0.63        | 0.92 | 0.84        | 0.90 | <b>0.90</b> |
| 70 | Taurine                | 0.95 | 0.30        | 1.26 | <b>1.30</b> | 1.06 | 0.29        |
| 71 | Thymol                 | 0.94 | 0.49        | 0.77 | <b>1.51</b> | 0.75 | <b>1.62</b> |
| 72 | Trigonelline           | 1.00 | 0.01        | 1.07 | 0.21        | 0.92 | 0.25        |
| 73 | Trimethylamine         | 1.41 | <b>1.20</b> | 0.89 | 0.49        | 0.79 | <b>1.20</b> |
| 74 | Trimethylamine N-oxide | 0.48 | <b>1.40</b> | 1.26 | 0.47        | 1.51 | 0.70        |
| 75 | Urea                   | 1.32 | <b>1.22</b> | 0.72 | <b>2.01</b> | 0.62 | <b>2.42</b> |
| 76 | Uridine                | 1.41 | 0.91        | 1.21 | <b>1.38</b> | 0.93 | 0.69        |
| 77 | Valine                 | 0.98 | 0.19        | 1.07 | 0.74        | 1.13 | 0.98        |
| 78 | cis-Aconitate          | 0.98 | 0.18        | 1.13 | <b>1.10</b> | 0.89 | 0.89        |
| 79 | trans-Aconitate        | 1.01 | 0.03        | 0.97 | 0.25        | 0.85 | 0.95        |

---

Table S3. Parameters of multivariate analysis in PCA and PCA trajectory score plot in urine.

| PCA            | R2X    | R2X(cum) | Eigenvalue | Q2      | Limit  | Q2(cum) | Significance |
|----------------|--------|----------|------------|---------|--------|---------|--------------|
| 1              | 0.23   | 0.23     | 12.4       | 0.158   | 0.0301 | 0.158   | R1           |
| 2              | 0.0824 | 0.313    | 4.45       | -0.0123 | 0.0305 | 0.148   | R2           |
|                |        |          |            |         |        |         |              |
| PCA trajectory | R2X    | R2X(cum) | Eigenvalue | Q2      | Limit  | Q2(cum) | Significance |
| 1              | 0.914  | 0.914    | 3.66       | 0.401   | 0.259  | 0.401   | R1           |
| 2              | 0.0504 | 0.965    | 0.202      | -0.116  | 0.341  | 0.341   | N3           |
| 3              | 0.0352 | 1        | 0.141      | 0.999   | 0.506  | 1       | N3           |

Figure S2. PLS-DA plots, parameters and results of permutation test before and 1 (A) (or 5 (B), or 10(C)) day after WTS.

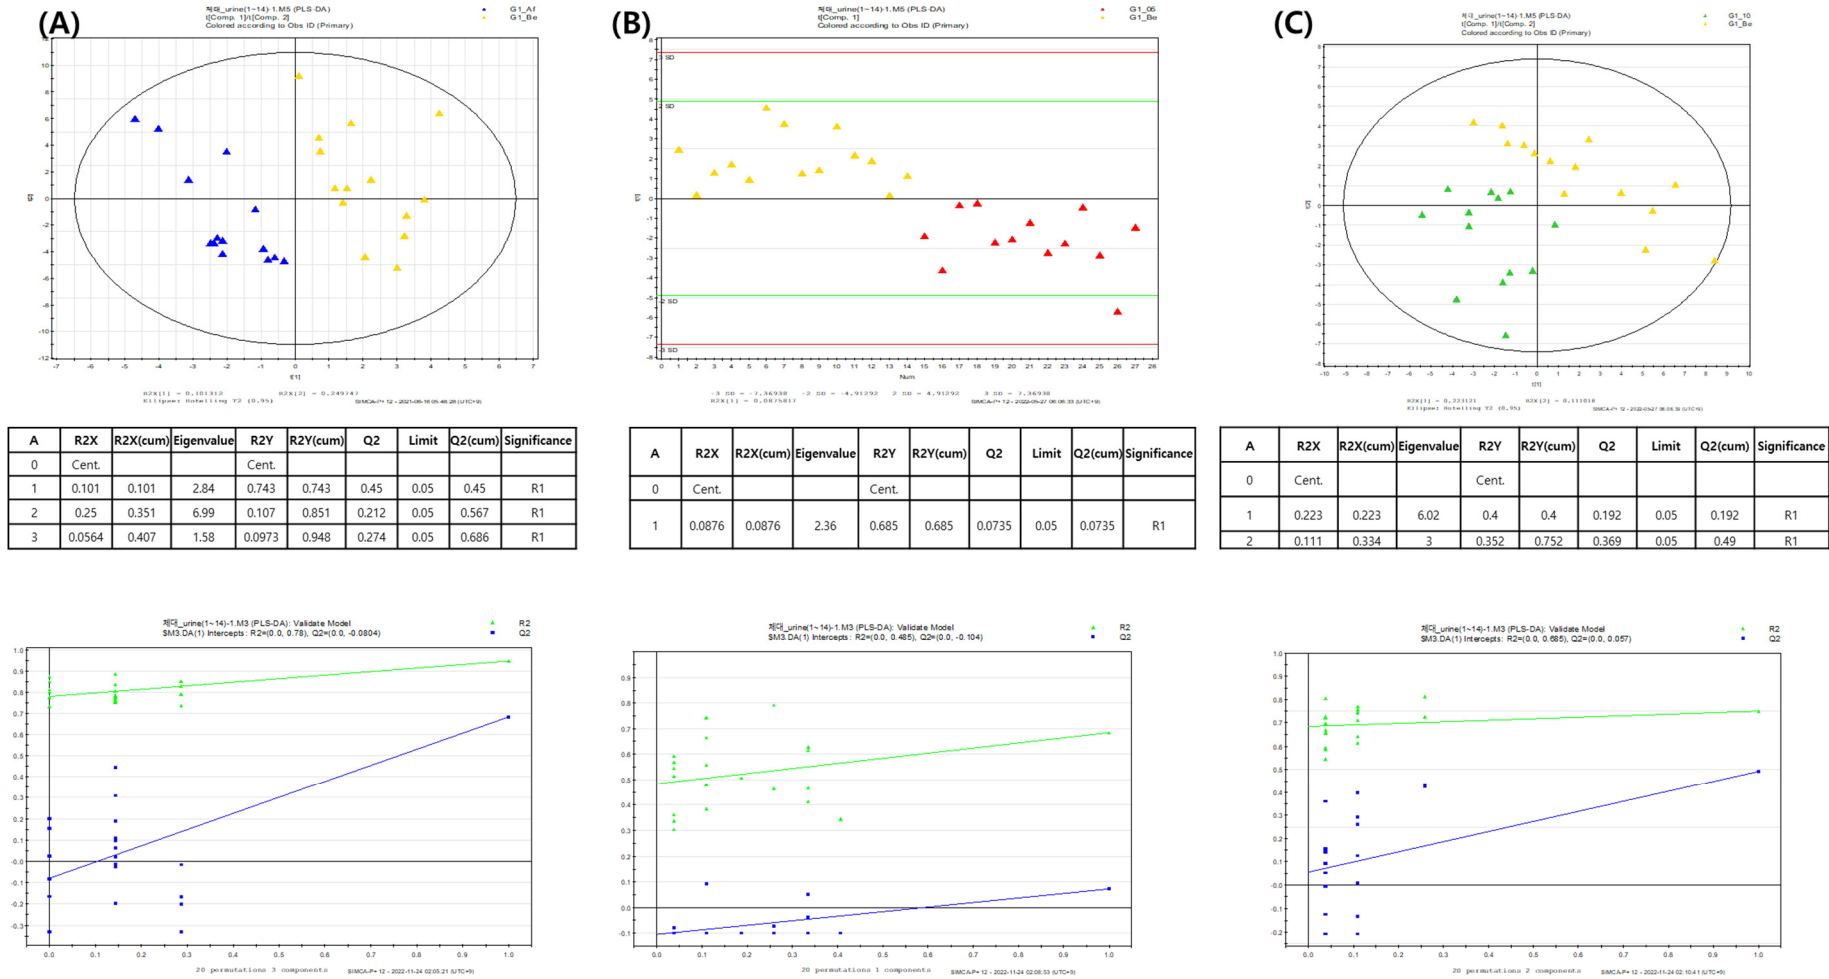



Figure S3. Metabolisms related to selected biomarkers (A) between before and 1 day after WTS and (B) between before and 5 days after WTS.

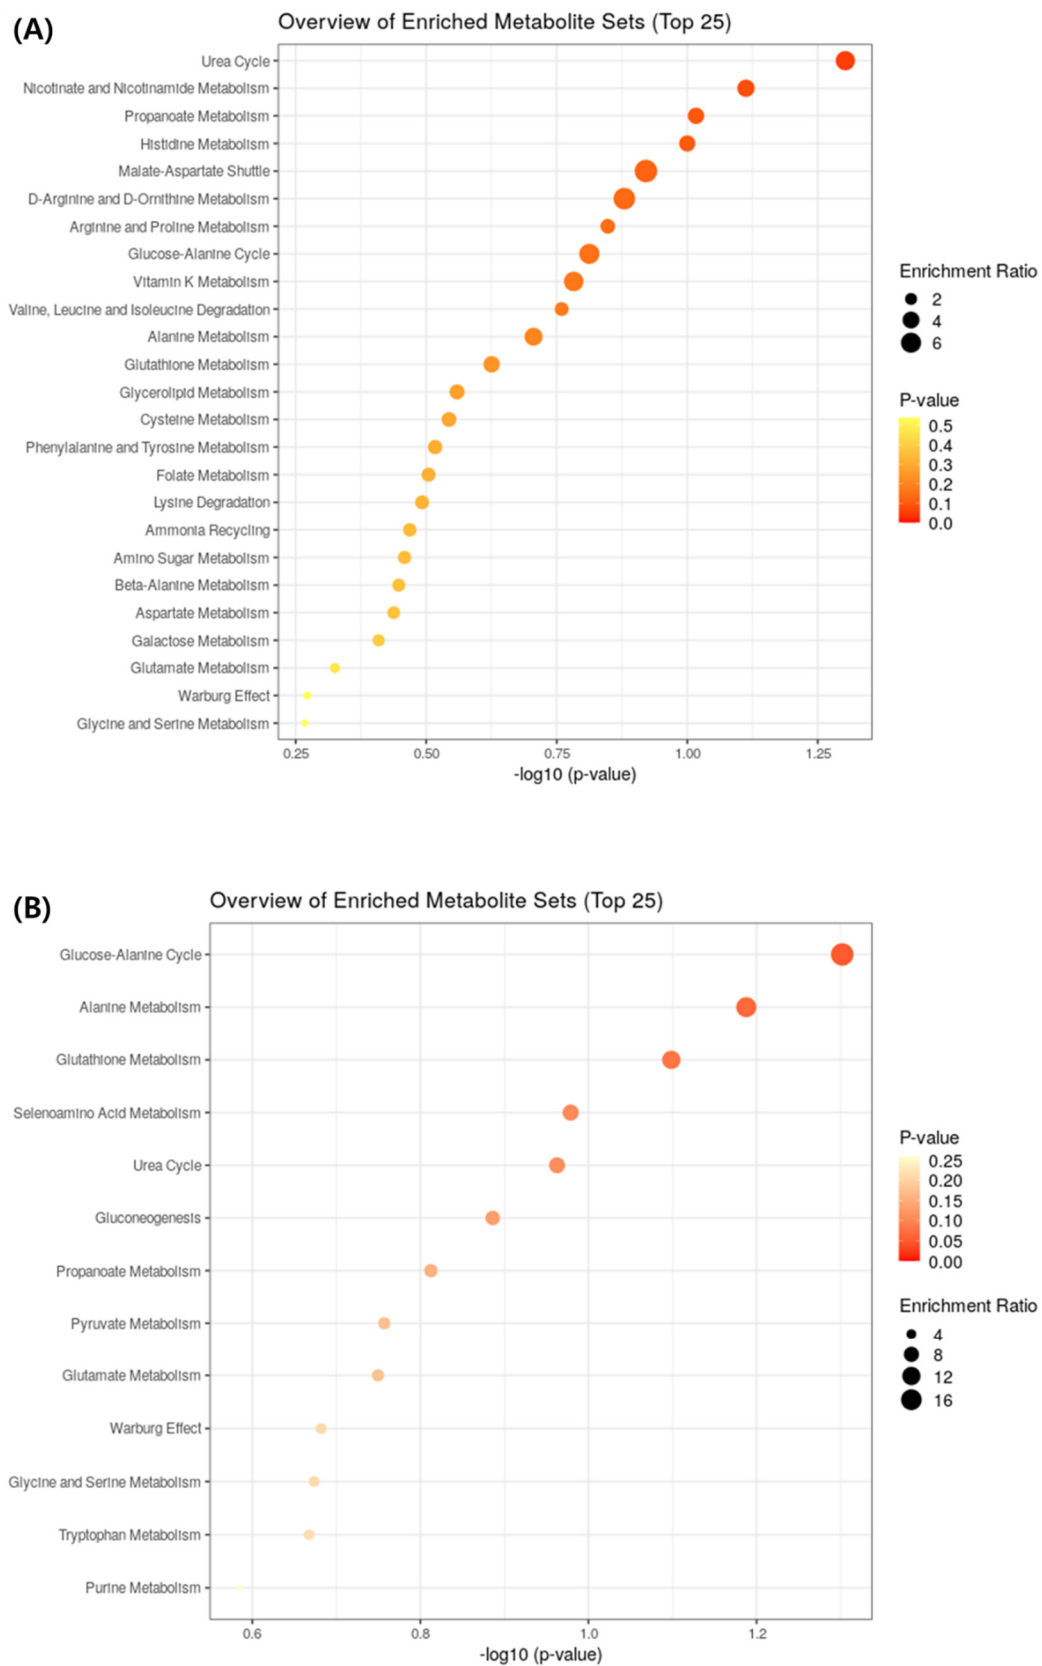

[illegible]
